# Supplementary material for: An Improvement of Mechanical Properties of Two Kinds of Silicone Resins Containing Ladder Segments by Chemical Modification with Trimethylborate
Source: MDPI journal article supplement (doi:10.3390/ma16083072), 2023-04-13
Supplement: s1 [file s1]

### Description of testing methods

Gel permeation chromatography was conducted on a Breeze QS HPLC (Waters) equipped with three different columns connected in series (HR-1, HR-2 and HR-4). Two detectors were employed in this study, a UV (Ultraviolet) Waters 2487 operated at a wavelength of 254 nm and differential refractive index Waters 2414. Tetrahydrofuran (THF) was used as eluent at a flow rate of 0.35 mL/min at 35 °C. The system was calibrated using polystyrene standards with different Mw obtained from Sigma-Aldrich using the universal calibration method.

Mechanical properties of the copolymer **III-IV** such as tensile strength and elongation at break were measured according to ISO 527-2 using the Universal Testing Machine Instron 5966 with sample dimensions: 0.1 x 0.01 x 0.00035 m. At least 5 samples were used for each composition.

Adhesion of copolymers to metals was tested according to ISO 4624:2002 by the destructively testing of the bonded coupons using PosiTest AT-M Manual Adhesion Tester (DeFelsko, USA). Average of 5 measurements is reported.

Drop Shape Analyzer DSA100E KRUSS was employed to study the contact angle of a water droplet on the block-copolymers films by the sessile drop method. Average of 5 measurements taken on polymer samples coated on 5 separate metal substrates is reported as the water contact angle.

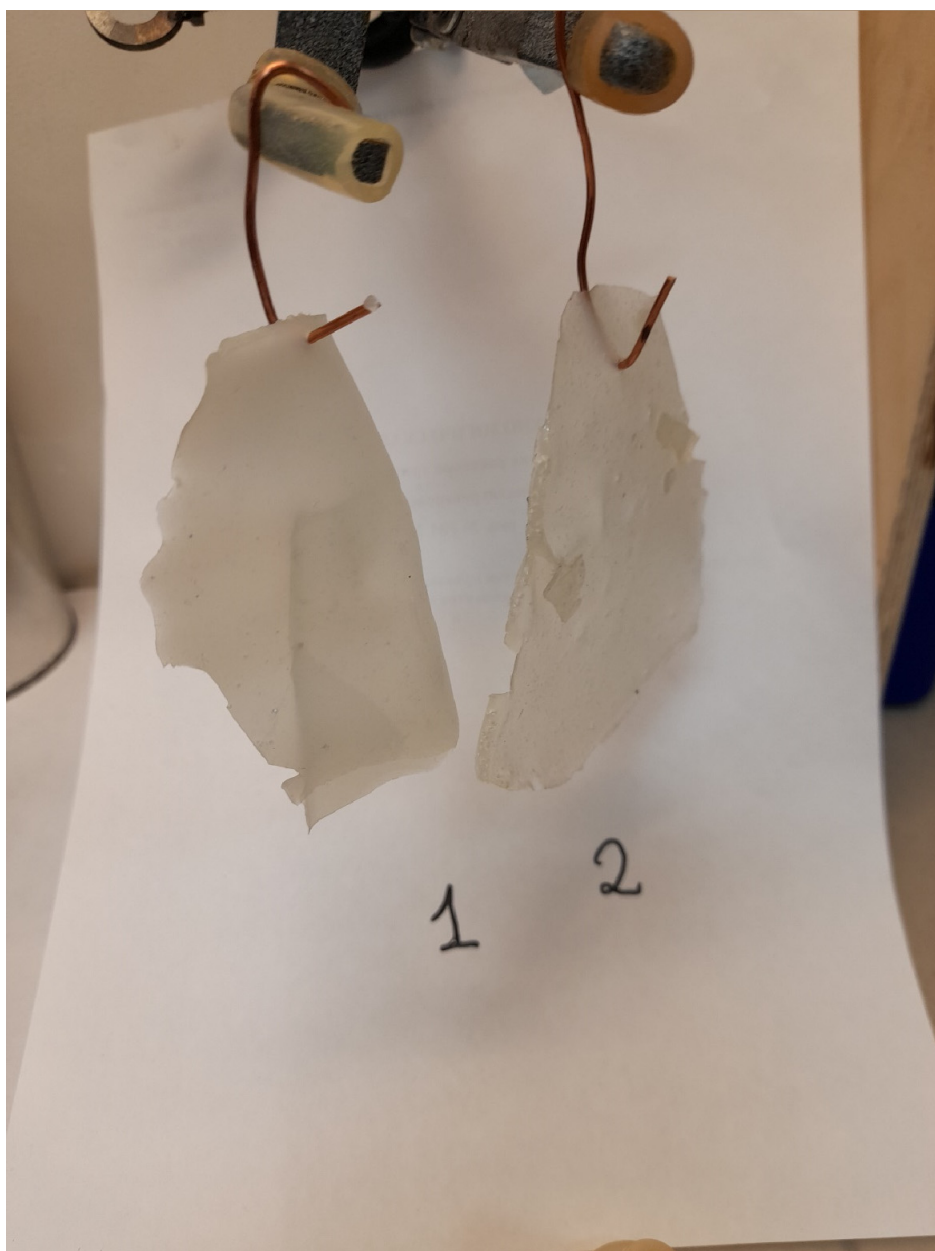

Figure S1. The films of modified copolymers **III** (1) and **IV** (2).

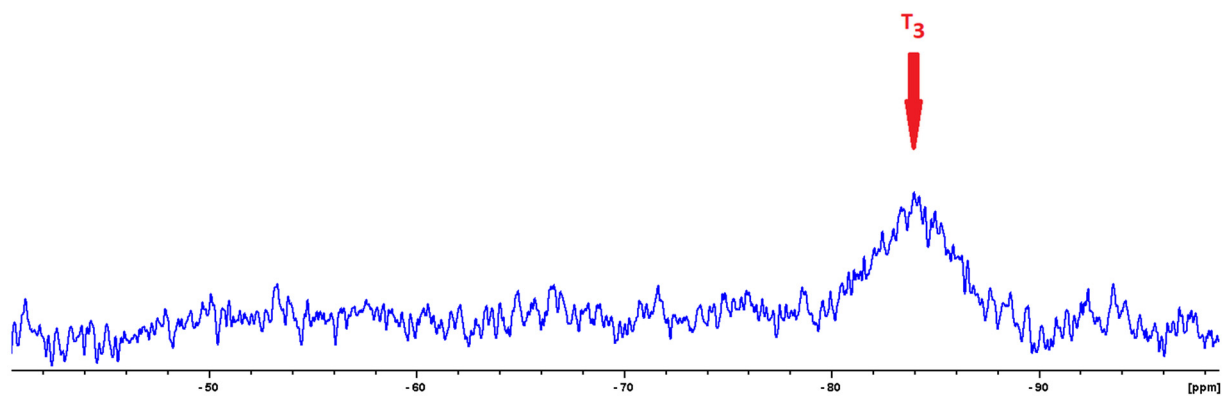

Figure S2.  $^{29}\text{Si}$  NMR spectrum of copolymer III after modification in chloroform- d solution.

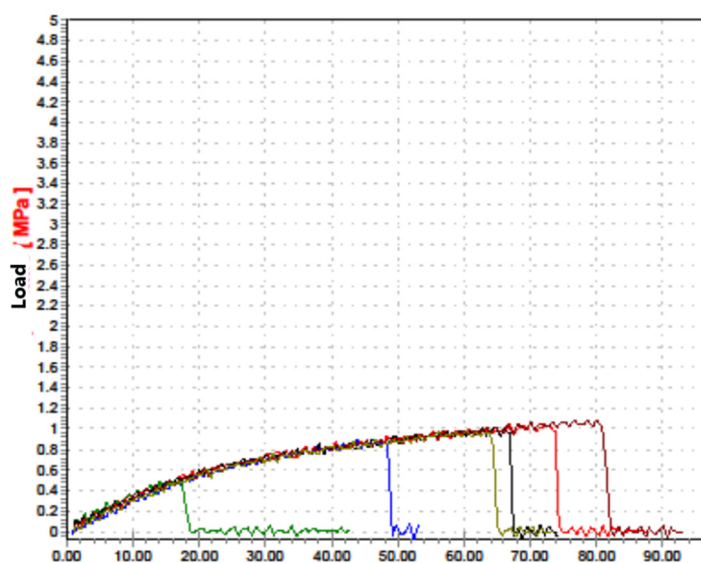

Figure S3. Mechanical testing of copolymer III before modification

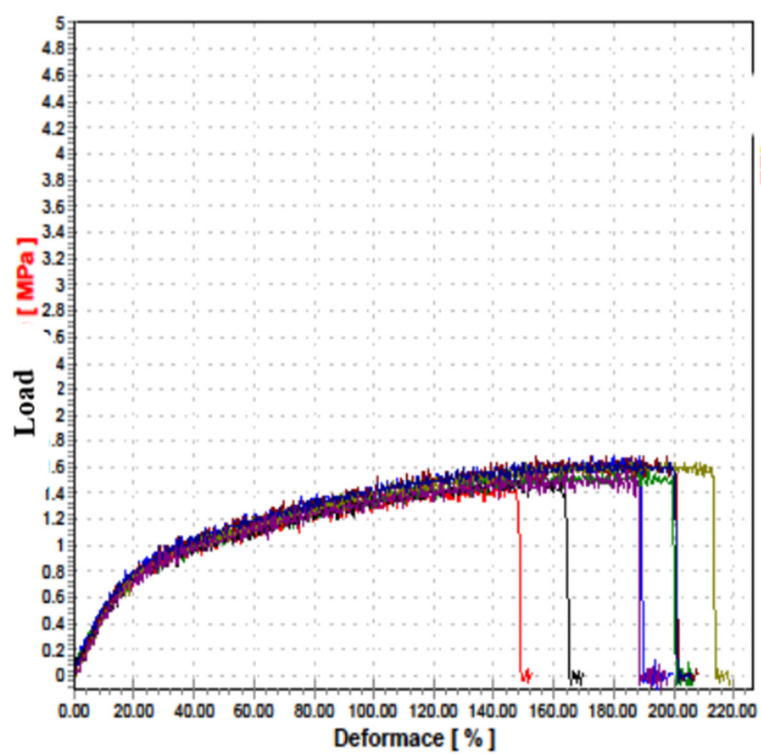

Figure S4. Mechanical testing of copolymer III after modification

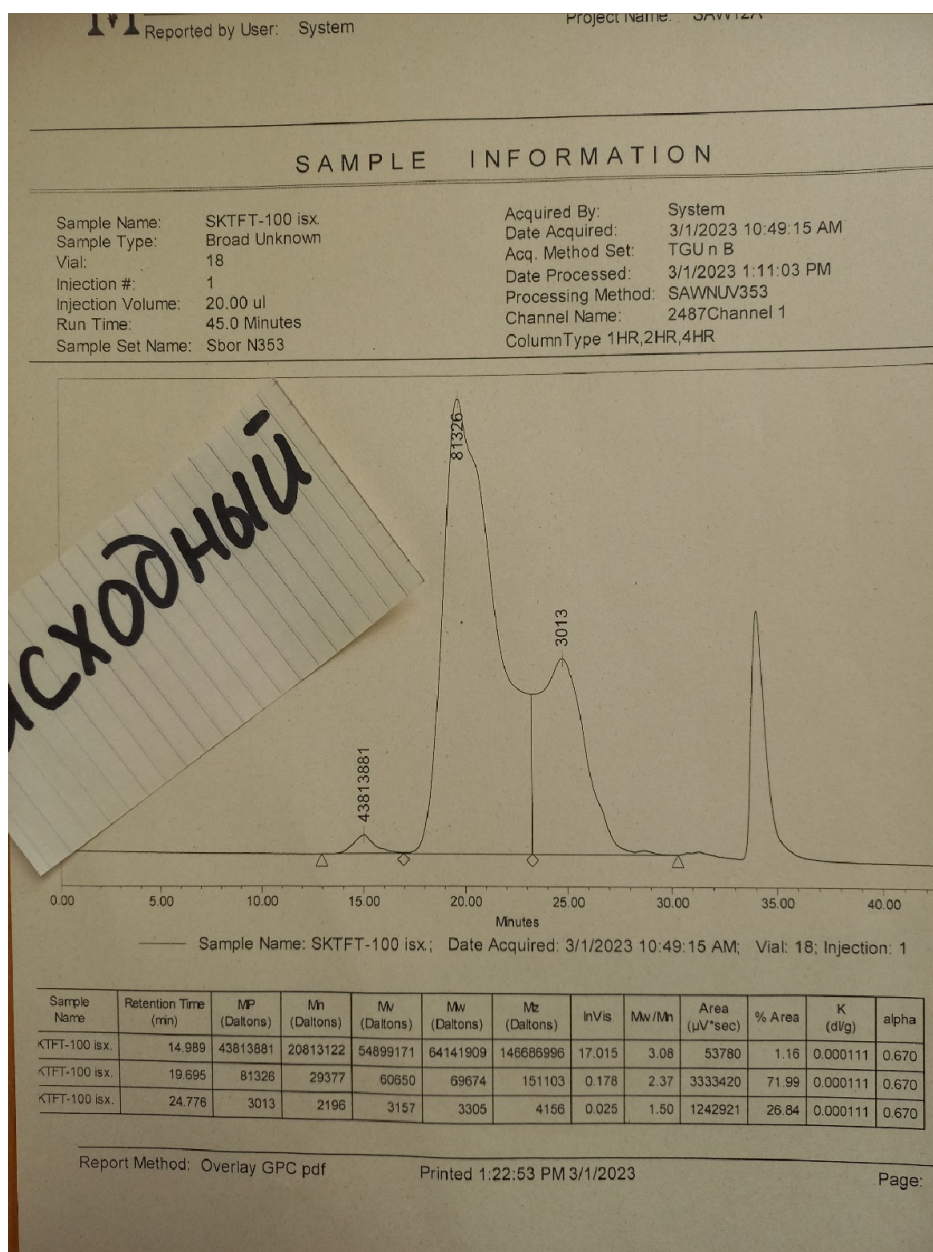

Figure S5. The chromatogram of copolymer IV before heating (starting copolymer).

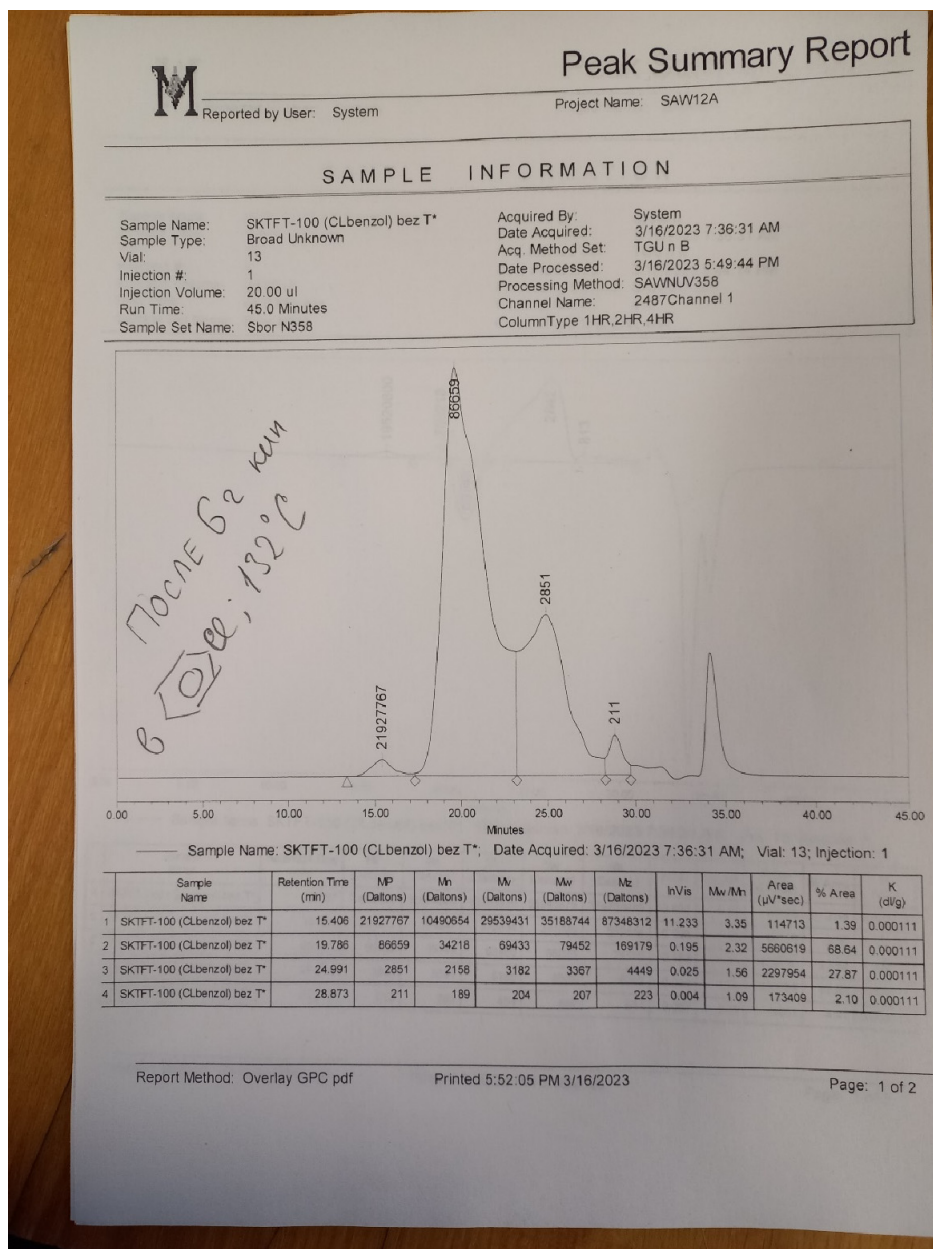

Figure S6. The chromatogram of copolymer IV after heating at 132°C in chlorobenzene at 6 hours.
